# Supplementary material
Source: PubMed Central journal article supplement (PMC7822984)
Supplement: 10815_2020_2004_MOESM1_ESM.pdf [file 10815_2020_2004_MOESM1_ESM.pdf]

## APPENDIX 1: DIAGNOSTIC ICD9 CODES

| CONGENITAL ANOMALIES (740-759)                                      |
|---------------------------------------------------------------------|
| 740 Anencephalus and similar anomalies                              |
| 741 Spina bifida                                                    |
| 742 Other congenital anomalies of nervous system                    |
| 743 Congenital anomalies of eye                                     |
| 744 Congenital anomalies of ear, face, and neck                     |
| 745 Bulbus cordis anomalies and anomalies of cardiac septal closure |
| 746 Other congenital anomalies of heart                             |
| 747 Other congenital anomalies of circulatory system                |
| 748 Congenital anomalies of respiratory system                      |
| 749 Cleft palate and cleft lip                                      |
| 750 Other congenital anomalies of upper alimentary tract            |
| 751 Other congenital anomalies of digestive system                  |
| 753 Congenital anomalies of urinary system                          |
| 754 Certain congenital musculoskeletal deformities                  |
| 755 Other congenital anomalies of limbs                             |
| 756 Other congenital musculoskeletal anomalies                      |
| 757 Congenital anomalies of the integument                          |
| 758 Chromosomal anomalies                                           |
| 759 Other and unspecified congenital anomalies                      |

### **Cardiac Problems**

Includes congenital heart disease 740 to 759

|        |                           |
|--------|---------------------------|
| 779.85 | CARDIAC ARREST OF NEWBORN |
| 782.5  | CYANOSIS                  |

### **Respiratory Problems**

Other respiratory disease of newborn 770 to 770.7

|                 |                                                                 |
|-----------------|-----------------------------------------------------------------|
| 769             | RESPIRATORY DISTRESS SYNDROME IN NEWBORN                        |
| 770.10          | FETAL AND NEWBORN ASPIRATION, UNSPECIFIED                       |
| 770.17          | OTHER FETAL AND NEWBORN ASPIRATION WITHOUT RESPIRATORY SYMPTOMS |
| 770.18          | OTHER FETAL AND NEWBORN ASPIRATION WITH RESPIRATORY SYMPTOMS    |
| 770.2           | INTERSTITIAL EMPHYSEMA AND RELATED CONDITIONS OF NEWBORN        |
| 770.3           | PULMONARY HEMORRHAGE OF FETUS OR NEWBORN                        |
| 770.4           | PRIMARY ATELECTASIS OF NEWBORN                                  |
| 770.5           | OTHER AND UNSPECIFIED ATELECTASIS OF NEWBORN                    |
| 770.6           | TRANSITORY TACHYPNEA OF NEWBORN                                 |
| 770.8           | RESPIRATORY PROBLEM OF THE NEWBORN                              |
| 770.81          | PRIMARY APNEA OF NEWBORN                                        |
| 770.82          | OTHER APNEA OF NEWBORN                                          |
| 770.83          | CYANOTIC ATTACKS OF NEWBORN                                     |
| 770.84          | RESPIRATORY FAILURE OF NEWBORN                                  |
| 770.87          | RESPIRATORY ARREST OF NEWBORN                                   |
| 770.88          | HYPOXEMIA OF NEWBORN                                            |
| 770.9           | UNSPECIFIED RESPIRATORY CONDITION OF FETUS AND NEWBORN          |
| 771.0-<br>771.5 | RESPIRATORY PROBLEMS OF NEWBORN                                 |
| 786.03          | APNEA                                                           |
| 799.1           | RESPIRATORY ARREST                                              |

### Neurologic Conditions

|       |                                                                                |
|-------|--------------------------------------------------------------------------------|
| 767   | BIRTH TRAUMA                                                                   |
| 768   | INTRAUTERINE HYPOXIA AND BIRTH ASPHYXIA                                        |
| 772.1 | INTRAVENTRICULAR HEMORRHAGE                                                    |
| 772.2 | SUBARACHNOID HEMORRHAGE OF NEWBORN                                             |
| 779.0 | CONVULSIONS IN NEWBORN                                                         |
| 779.1 | OTHER AND UNSPECIFIED CEREBRAL IRRITABILITY IN NEWBORN                         |
| 779.2 | CEREBRAL DEPRESSION COMA AND OTHER ABNORMAL CEREBRAL SIGNS IN FETUS OR NEWBORN |
| 779.7 | PERIVENTRICULAR LEUKOMALACIA                                                   |

### Infectious Conditions

771 - ALL

|         |                                                                      |
|---------|----------------------------------------------------------------------|
| 137-139 | INFECTIOUS AND PARASITIC DISEASE, LATE EFFECTS OF INFECTIOUS DISEASE |
| 771.4   | OMPHALITIS OF THE NEWBORN                                            |
| 771.81  | SEPTICEMIA [SEPSIS] OF NEWBORN                                       |
| 771.82  | URINARY TRACT INFECTION OF NEWBORN                                   |
| 771.83  | BACTEREMIA OF NEWBORN                                                |

### Hematologic Conditions

772 – 773, 776

|                                |                                                                                    |
|--------------------------------|------------------------------------------------------------------------------------|
| 282-<br>285.8<br>286-<br>287.9 | BLOOD CONDITIONS, NOT ANEMIA OR WHITE BLOOD CELL DISORDERS                         |
| 773.0                          | HEMOLYTIC DISEASE OF FETUS OR NEWBORN DUE TO RH ISOIMMUNIZATION                    |
| 773.1                          | HEMOLYTIC DISEASE OF FETUS OR NEWBORN DUE TO ABO ISOIMMUNIZATION                   |
| 773.2                          | HEMOLYTIC DISEASE OF FETUS OR NEWBORN DUE TO OTHER AND UNSPECIFIED ISOIMMUNIZATION |
| 773.4                          | KERNICTERUS OF FETUS OR NEWBORN DUE TO ISOIMMUNIZATION                             |
| 773.5                          | LATE ANEMIA OF FETUS OR NEWBORN DUE TO ISOIMMUNIZATION                             |

|       |                                                                       |
|-------|-----------------------------------------------------------------------|
| 774.7 | KERNICTERUS OF FETUS OR NEWBORN NOT DUE TO ISOIMMUNIZATION            |
| 776.0 | HEMORRHAGIC DISEASE OF NEWBORN                                        |
| 776.2 | DISSEMINATED INTRAVASCULAR COAGULATION IN NEWBORN                     |
| 776.8 | OTHER SPECIFIED TRANSIENT HEMATOLOGICAL DISORDERS OF FETUS OR NEWBORN |
| 776.9 | UNSPECIFIED HEMATOLOGICAL DISORDER SPECIFIC TO NEWBORN                |

**Gastrointestinal/Feeding/Nutrition Conditions**

|        |                                                                   |
|--------|-------------------------------------------------------------------|
| 777.1  | MECONIUM OBSTRUCTION IN FETUS OR NEWBORN                          |
| 777.2  | INTESTINAL OBSTRUCTION IN NEWBORN DUE TO INSPISSATED MILK         |
| 777.3  | HEMATEMESIS AND MELENA OF NEWBORN DUE TO SWALLOWED MATERNAL BLOOD |
| 777.4  | TRANSITORY ILEUS OF NEWBORN                                       |
| 777.50 | NECROTIZING ENTEROCOLITIS IN NEWBORN, UNSPECIFIED                 |
| 777.51 | STAGE I NECROTIZING ENTEROCOLITIS IN NEWBORN                      |
| 777.52 | STAGE II NECROTIZING ENTEROCOLITIS IN NEWBORN                     |
| 777.53 | STAGE III NECROTIZING ENTEROCOLITIS IN NEWBORN                    |
| 779.3  | FEEDING PROBLEMS IN NEWBORN                                       |
| 779.32 | BILIOUS VOMITING IN NEWBORN                                       |
| 779.33 | OTHER VOMITING IN NEWBORN                                         |
| 779.34 | FAILURE TO THRIVE IN NEWBORN                                      |

**OTHER**

|                                                  |                                 |
|--------------------------------------------------|---------------------------------|
| 764.10-764.18<br>764.20-7.64.28<br>764.90-764.98 | INTRAUTERINE GROWTH RETARDATION |
|--------------------------------------------------|---------------------------------|
